# Supplementary material
Source: ML conference proceedings conference paper supplement (https://proceedings.mlr.press/v89/anari19a.html)
Supplement: Supplementary file [file anari19a-supp.pdf]

## A Extensions

### A.1 Knapsack constraint

Consider a knapsack constraint  $\mathcal{K} = \{S \subseteq [n] : \sum_{e \in S} c_e \leq 1\}$ , where  $c_e > 0$  for all  $e \in [n]$ . Our interest is to solve the following robust problem

$$\max_{S \in \mathcal{K}} \min_{i \in [k]} f_i(S) \quad (9)$$

**Corollary 1.** *For Problem (9), there is a polynomial time algorithm that returns a set  $S^{\text{ALG}}$ , such that for all  $i \in [k]$ , for a given  $0 < \epsilon < 1$ ,*

$$f_i(S^{\text{ALG}}) \geq (1 - \epsilon) \cdot \max_{S \in \mathcal{K}} \min_{j \in [k]} f_j(S),$$

and  $\sum_{e \in S^{\text{ALG}}} c_e \leq \ell$  for  $\ell = O(\ln \frac{k}{\epsilon})$ . Moreover,  $S^{\text{ALG}}$  can be covered by at most  $\ell$  sets in  $\mathcal{K}$ .

Instead of using the standard greedy for every  $\tau = \{1, \dots, \ell\}$ , we design an extended version of the ‘‘bang-per-buck’’ greedy algorithm. We formalize this procedure in Algorithm 3 below. Even though the standard ‘‘bang-per-buck’’ greedy algorithm does not provide any approximation factor, if we relax the knapsack constraint to be  $\sum_{e \in S} c_e \leq 2$ , then the algorithm gives a  $1 - 1/e$  factor. There are other approaches to avoid this relaxation, see e.g. (Sviridenko, 2004).

---

**Algorithm 3** Extended ‘‘Bang-per-Buck’’ Algorithm for Knapsack Constraints

---

**Input:**  $\ell \geq 1$ , monotone submodular function  $g : 2^V \rightarrow \mathbb{R}_+$ , knapsack constraint  $\mathcal{K}$ .

**Output:** sets  $S_1, \dots, S_\ell \in \mathcal{K}$ .

```

1: for  $\tau = 1, \dots, \ell$  do
2:    $S_\tau \leftarrow \emptyset$ 
3:   while  $V \neq \emptyset$  do
4:     Compute

```

$$e^* = \operatorname{argmax}_{e \in V} \frac{g(\cup_{j=1}^{\tau} S_j + e) - g(\cup_{j=1}^{\tau} S_j)}{c_e}.$$

```

5:   if  $\sum_{e \in S_\tau} c_e + c_{e^*} \leq 2$  then
6:      $S_\tau \leftarrow S_\tau + e^*$ .
7:      $V \leftarrow V - e^*$ 
8:   Restart ground set  $V$ .

```

---

Given a monotone submodular function  $g : 2^V \rightarrow \mathbb{R}_+$ , Algorithm 3 produces a set  $S^{\text{ALG}} = S_1 \cup \dots \cup S_\ell$  such that  $g(S^{\text{ALG}}) \geq (1 - \frac{1}{e^\ell}) \cdot \max_{S \in \mathcal{K}} g(S)$ . Therefore, Corollary 1 can be easily proved by defining  $g$  in the same way as in Theorem 1, and running Algorithm 3 on  $g$  with  $\ell = O(\ln \frac{k}{\epsilon})$ .

### A.2 Multiple matroid constraints

Consider a family of  $r$  matroids  $\mathcal{M}_j = (V, \mathcal{I}_j)$  for  $j \in [r]$ . Our interest is to solve the following robust problem

$$\max_{S \in \bigcap_{j=1}^r \mathcal{I}_j} \min_{i \in [k]} f_i(S) \quad (10)$$

**Corollary 2.** *For Problem (10), there is a polynomial time algorithm that returns a set  $S^{\text{ALG}}$ , such that for all  $i \in [k]$ , for a given  $0 < \epsilon < 1$ ,*

$$f_i(S^{\text{ALG}}) \geq (1 - \epsilon) \cdot \max_{S \in \bigcap_{j=1}^r \mathcal{I}_j} \min_{i \in [k]} f_i(S),$$

where  $S^{\text{ALG}}$  is the union of  $O(\log \frac{k}{\epsilon} / \log \frac{r+1}{r})$  independent sets in  $\mathcal{I}$ .

Fisher et al. (1978) proved that the standard greedy algorithm gives a  $1/(1+r)$  approximation for problem (10) when  $k = 1$ . Therefore, we can adapt Algorithm 1 to produce a set  $S^{\text{ALG}} = S_1 \cup \dots \cup S_\ell$  such that

$$f(S^{\text{ALG}}) \geq \left(1 - \left(\frac{r}{r+1}\right)^\ell\right) \cdot \max_{S \in \bigcap_{j=1}^r \mathcal{I}_j} f(S).$$

Then, Corollary 2 can be proved similarly to Theorem 1 by choosing  $\ell = O(\log \frac{k}{\epsilon} / \log \frac{r+1}{r})$ .

### A.3 Distributionally robust over polyhedral sets

Let  $\mathcal{Q} \subseteq \Delta(k)$  be a polyhedral set, where  $\Delta(k)$  is the probability simplex on  $k$  elements. For  $q \in \mathcal{Q}$ , denote  $f_q := q_1 f_1 + \dots + q_k f_k$ , which is also monotone and submodular. Given a matroid  $\mathcal{M} = (V, \mathcal{I})$ , our interest is to solve the following distributionally robust problem

$$\max_{S \in \mathcal{I}} \min_{q \in \mathcal{Q}} f_q(S) \quad (11)$$

Denote by  $\text{Vert}(\mathcal{Q})$  the set of extreme points of  $\mathcal{Q}$ , which is finite since  $\mathcal{Q}$  is polyhedral. Then, problem (11) is equivalent to  $\max_{S \in \mathcal{I}} \min_{q \in \text{Vert}(\mathcal{Q})} f_q(S)$ . Then, we can easily derive Corollary 3 (below) by applying Theorem 1 in the equivalent problem. Note that when  $\mathcal{Q}$  is the simplex we get the original Theorem 1.

**Corollary 3.** *For Problem (11), there is a polynomial time algorithm that returns a set  $S^{\text{ALG}}$ , such that for all  $i \in [k]$ , for a given  $0 < \epsilon < 1$ ,*

$$f_i(S^{\text{ALG}}) \geq (1 - \epsilon) \cdot \max_{S \in \mathcal{I}} \min_{q \in \mathcal{Q}} f_q(S),$$

with  $S^{\text{ALG}} = S_1 \cup \dots \cup S_\ell$  for  $\ell = O(\log \frac{|\text{Vert}(\mathcal{Q})|}{\epsilon})$  and  $S_1, \dots, S_\ell \in \mathcal{I}$ .

## B Continuous Offline Algorithm

### B.1 Preliminaries of Multilinear Extension

Consider a set function  $f$ , and its multilinear extension  $F$  as in equation (4). We can state the following facts. For more details see (Calinescu et al., 2011).

**Fact 1.** [Multilinear Extensions of Monotone Submodular Functions] Let  $f$  be a monotone submodular function and  $F$  its multilinear extension.

1. By monotonicity of  $f$ , we have  $\frac{\partial F}{\partial y_e} \geq 0$  for any  $e \in V$ . This implies that for any  $x \leq y$  coordinate-wise,  $F(x) \leq F(y)$ . On the other hand, by submodularity of  $f$ ,  $F$  is concave in any positive direction, i.e., for any  $e_1, e_2 \in V$  we have  $\frac{\partial^2 F}{\partial y_{e_1} \partial y_{e_2}} \leq 0$ .
2. Throughout the paper we will denote by  $\nabla_e F(y) := \frac{\partial F(y)}{\partial y_e}$ , and  $\Delta_e F(y) := \mathbb{E}_{S \sim y}[f_S(e)]$ . It is easy to see that  $\Delta_e F(y) = (1 - y_e) \nabla_e F(y)$ . Now, consider two points  $x, y \in [0, 1]^V$  and two sets sampled independently from these vectors:  $S \sim x$  and  $U \sim y$ . Then, by submodularity

$$f(S \cup U) \leq f(S) + \sum_{e \in V} \mathbf{1}_U(e) f_S(e). \quad (12)$$

3. By taking expectation over  $x$  and  $y$  in (12), we obtain

$$\begin{aligned} F(x \vee y) &\leq F(x) + \sum_{e \in V} y_e \Delta_e F(x) \\ &\leq F(x) + \sum_{e \in V} y_e \nabla_e F(x). \end{aligned}$$

Therefore, we get the following important property

$$F(x \vee y) \leq F(x) + y \cdot \nabla F(x). \quad (13)$$

### B.2 Algorithm analysis

In this section, we present a continuous algorithm that achieves a tight bi-criteria approximation for the robust submodular optimization problem (1) and prove Theorem 6. This algorithm achieves optimal constants for the approximation, matching the hardness result in (Krause et al., 2008a).

**Theorem 6.** Let  $(V, \mathcal{I})$  be a matroid and let  $f_i : 2^V \rightarrow \mathbb{R}_+$  be a monotone submodular function for  $i \in [k]$ . Then, there is a randomized polynomial time algorithm that with constant probability returns a set  $S^{\text{ALG}}$ , such that for all  $i \in [k]$ , for a given  $0 < \epsilon < 1$ ,

$$f_i(S^{\text{ALG}}) \geq (1 - \epsilon) \cdot \max_{S \in \mathcal{I}} \min_{j \in [k]} f_j(S),$$

and  $S^{\text{ALG}} = S_1 \cup \dots \cup S_\ell$  for  $\ell = O(\ln \frac{k}{\epsilon})$ , and  $S_1, \dots, S_\ell \in \mathcal{I}$ .

Our overall approach is to first find a fractional solution with a desirable approximation guarantee and then round it to an integral solution. We use a relaxation of a matroid to its convex hull to accommodate the search for a fractional solution.

For this algorithm, we need an estimate  $\gamma$  of the value of the optimal solution which we denote by OPT. We prove the following lemma which solves an approximate decision version of our optimization problem. The proof of Theorem 6 follows from the lemma and a search over an approximate value for OPT.

**Lemma 1.** There is a randomized polynomial time algorithm that given  $\gamma \leq \text{OPT}$  and  $0 < \epsilon < 1$  returns with constant probability a set  $S^{\text{ALG}}$  such that for all  $i \in [k]$ ,

$$f_i(S^{\text{ALG}}) \geq (1 - \epsilon) \cdot \gamma,$$

where  $S^{\text{ALG}} = \bigcup_{j \in [\ell]} S_j$  with  $\ell = O(\ln \frac{k}{\epsilon})$  and  $S_j \in \mathcal{I}$  for each  $j \in [\ell]$ .

First, we finish the proof of Theorem 6 assuming Lemma 1.

*Theorem 6.* We apply the algorithm from Lemma 1 with approximation loss  $\epsilon/2$  and with different values of  $\gamma$ , some of which may be larger than OPT, but at least one of them is guaranteed to satisfy  $(1 - \epsilon/2) \text{OPT} \leq \gamma \leq \text{OPT}$ . At the end we return the set  $S^{\text{ALG}}$  from our runs with the highest value of  $\min_{i \in [k]} f_i(S^{\text{ALG}})$ .

Before describing the set of candidate values of  $\gamma$  that we try, note that if the algorithm succeeds for the particular value of  $\gamma$  satisfying  $(1 - \epsilon/2) \text{OPT} \leq \gamma \leq \text{OPT}$ , then we get

$$\min_{i \in [k]} f_i(S^{\text{ALG}}) \geq (1 - \epsilon/2) \cdot \gamma \geq (1 - \epsilon) \text{OPT},$$

and since we return the set with the highest  $\min_{i \in [k]} f_i(S^{\text{ALG}})$ , the algorithm's output will have the desired approximation guarantee.

It remains to show that a set of polynomial size of values for  $\gamma$  exists such that one of them satisfies  $(1 - \epsilon/2) \text{OPT} \leq \gamma \leq \text{OPT}$ . To this end we simply try  $\gamma = n f_i(e) (1 - \epsilon/2)^j$  for all  $i \in [k]$ ,  $e \in V$ , and  $j = 0, \dots, \lceil \ln_{1-\epsilon/2}(1/n) \rceil$ . Note that there exists an index  $i^* \in [k]$  and a set  $S^* \in \mathcal{I}$  such that  $\text{OPT} = f_{i^*}(S^*)$ . Now let  $e^* = \arg \max_{e \in S^*} f_{i^*}(e)$ . Because of submodularity and monotonicity we have  $\frac{1}{|S^*|} f_{i^*}(S^*) \leq f_{i^*}(e^*) \leq f_{i^*}(S^*)$ . So, we can conclude that  $1 \geq \text{OPT} / n f_{i^*}(e^*) \geq 1/n$ , which implies that  $j = \lceil \ln_{1-\epsilon/2}(\text{OPT} / n f_{i^*}(e^*)) \rceil$  is in the correct interval, obtaining

$$(1 - \epsilon/2) \text{OPT} \leq n f_{i^*}(e^*) (1 - \epsilon/2)^j \leq \text{OPT}.$$

This finishes the proof.  $\square$

We remark that the dependency of the running time on  $\epsilon$  can be made logarithmic by running a binary search on  $j$  as opposed to trying all  $j = 0, \dots, \lceil \ln_{1-\epsilon/2}(1/n) \rceil$ . We just need to run the algorithm from Lemma 1 for each  $\gamma$  polynomially many times to make the failure probability exponentially small whenever  $\gamma \leq \text{OPT}$ .

The rest of this section is devoted to prove Lemma 1. To achieve a strong concentration bound when rounding the fractional solution, we truncate  $f_i$  to  $\min\{\gamma, f_i\}$ . Hereafter, we use  $f_i^\gamma$  to refer to  $\min\{\gamma, f_i\}$ . Note that submodularity and monotonicity is preserved under this truncation. Also, we denote by  $F_i^\gamma$  the corresponding multilinear extension of  $f_i^\gamma$ .

We describe the continuous process counterpart of the algorithm in this section. The discretization details follow using standard methods (Vondrák, 2008).

**Continuous Greedy.** We start a continuous gradient step process where  $y(\tau)$  represents the point at time  $\tau$  we are at. We start at  $y(0) = 0$  and take continuous gradient steps in direction  $\frac{dy}{d\tau} = v_{\text{all}}(y)$ , such that  $v_{\text{all}}(y)$  satisfies the following conditions:

- (a)  $v_{\text{all}}(y) \cdot \nabla F_i^\gamma(y) \geq \gamma - F_i^\gamma(y)$  for all  $i \in [k]$ ,
- (b)  $v_{\text{all}}(y) \in \mathcal{P}(\mathcal{M})$ , and
- (c)  $v_{\text{all}}(y) + y \in [0, 1]^V$ .

First, we show that such  $v_{\text{all}}$  always exists. Take  $x^*$  to be the indicator vector corresponding to the optimal solution. For any  $y$ ,  $v^* = (x^* - y) \vee 0$  is a positive direction satisfying inequality (13), and for all  $i \in [k]$ :

$$v^* \cdot \nabla F_i^\gamma(y) \geq F_i^\gamma(y + v^*) - F_i^\gamma(y) = \gamma - F_i^\gamma(y), \quad (14)$$

where the last equality holds since  $F_i^\gamma(y) \leq \gamma$  for all  $y$ . It is easy to check that  $v^*$  satisfies the rest of the constraints (a)-(c), implying that there exists a feasible solution to the above system of linear inequalities. Therefore, we can solve a linear program defined by these inequalities to obtain a solution  $v_{\text{all}}(y)$ .

The above continuous process goes on until time  $\ell = O(\ln \frac{k}{\epsilon})$ . We intentionally set  $\ell > 1$  to obtain a (fractional) solution with a higher budget, which is useful for achieving a bi-criteria approximation. Next we show the following claim.

**Claim 1.** *For any  $\tau \geq 0$ ,  $y(\tau) \in \tau\mathcal{P}(\mathcal{M}) \cap [0, 1]^V$  and for all  $i \in [k]$ ,*

$$F_i^\gamma(y(\tau)) \geq (1 - e^{-\tau})\gamma.$$

*Proof.* For any  $\tau \geq 0$ , we have

$$y(\tau) = \int_0^\tau v_{\text{all}}(y(s)) ds = \int_0^1 \tau \cdot v_{\text{all}}(y(\tau s)) ds.$$

So,  $y(\tau)$  is a convex combination of vectors in  $\tau\mathcal{P}(\mathcal{M})$ . Moreover,  $(v_{\text{all}}(y))_j = 0$  when  $y_j = 1$ , thus  $y(\tau) \in [0, 1]^V$  proving the first part of the claim.

For the second part, observe that for all  $i \in [k]$  we have

$$\begin{aligned} \frac{dF_i^\gamma(y(\tau))}{d\tau} &= \frac{dy(\tau)}{d\tau} \cdot \nabla F_i^\gamma(y(\tau)) \\ &= v_{\text{all}}(y(\tau)) \cdot \nabla F_i^\gamma(y(\tau)) \geq \gamma - F_i^\gamma(y(\tau)). \end{aligned}$$

Moreover,  $F_i^\gamma(0) = 0$ . Now we solve the above differential equation to obtain

$$F_i^\gamma(y(\tau)) \geq (1 - e^{-\tau})\gamma$$

for each  $i \in [k]$  as claimed.  $\square$

Thus, by setting  $\ell = \ln \frac{k}{\epsilon} + \ln \frac{1}{c}$ , we obtain  $F_i^\gamma(y(\ell)) \geq (1 - \frac{\epsilon}{k} \cdot c) \cdot \gamma$  for all  $i \in [k]$  and a desired constant  $c < 1$ . We next show how to obtain an integral solution.

**Rounding.** The next lemma summarizes our rounding. We first show that the fractional solution at time  $\ell$  is contained in the matroid polytope of the  $\ell$ -fold union of matroid  $\mathcal{M}$ . We then do randomized swap rounding, introduced by Chekuri et al. (2010), in this matroid polytope. The truncation of the submodular functions, as well as properties of randomized swap rounding, play a crucial role in the proof.

**Lemma 2.** *Let  $\ell = \lceil \ln \frac{k}{\epsilon} + \ln \frac{1}{c} \rceil$  be an integer and  $y(\ell)$  be the output of the continuous greedy algorithm at time  $\ell$  such that  $F_i^\gamma(y(\ell)) \geq (1 - \frac{\epsilon}{k} \cdot c) \cdot \gamma$  for each  $i \in [k]$  and some constant  $c < 1$ . Then, there exists a polynomial time randomized algorithm that outputs a set  $S$  such that with probability  $\Omega(1)$ , for each  $i \in [k]$  we have*

$$f_i(S) \geq (1 - \epsilon) \cdot \gamma.$$

*Moreover,  $S$  is a union of at most  $\ell$  independent sets in  $\mathcal{M}$ .*

*Proof.* Let  $\mathcal{M}_\ell = \bigvee_\ell \mathcal{M}$  be the  $\ell$ -fold union of matroid  $\mathcal{M}$ , i.e.,  $I$  is an independent set in  $\mathcal{M}_\ell$  if and only if  $I$  is a union of  $\ell$  independent sets of  $\mathcal{M}$ . We denote by  $\mathcal{I}_\ell$  the set of independent sets of  $\mathcal{M}_\ell$ . The rank function of  $\mathcal{M}_\ell$  is given by  $r_{\mathcal{M}_\ell}(S) = \min_{A \subseteq S} |S \setminus A| + \ell \cdot r_{\mathcal{M}}(A)$  (see (Schrijver, 2003)). We first show that  $y = y(\ell)$  is in the convex hull of independent sets of matroid  $\mathcal{M}_\ell$ , i.e.,  $\mathcal{P}(\mathcal{M}_\ell)$ . This polytope is given by  $\mathcal{P}(\mathcal{M}_\ell) = \{x \in \mathbb{R}_+^V \mid x(S) \leq r_{\mathcal{M}_\ell}(S) \ \forall S \subseteq V\}$ , where  $x(S) = \sum_{e \in S} x_e$ . We now prove that  $y \in \mathcal{P}(\mathcal{M}_\ell)$ . For any  $S \subseteq V$  and  $A \subseteq S$ , we have  $y(S) = \sum_{e \in S \setminus A} y_e + y(A) \leq |S \setminus A| + \ell \cdot r_{\mathcal{M}}(A)$ , where the last inequality is due to the fact that  $y_e \leq 1$  for all  $e$ , and  $y(A) \leq \ell \cdot r_{\mathcal{M}}(A)$  because  $y \in \ell \cdot \mathcal{P}(\mathcal{M})$  by Claim 1. Therefore,  $y \in \mathcal{P}(\mathcal{M}_\ell)$ .

Next, we apply a randomized swap rounding (see (Chekuri et al., 2010)) in matroid  $\mathcal{M}_\ell$  to obtain the

solution. A feature of the randomized swap rounding is that it is oblivious to the specific function  $f_i$  used, and it is only a randomized function of the matroid space and the fractional solution.

Applying Theorem 5 to fractional solution  $y(\ell)$  and matroid  $\mathcal{M}_\ell$ , we obtain a random set  $S \in \mathcal{I}_\ell$  such that

$$\mathbb{E}[f_i^\gamma(S)] \geq F_i^\gamma(y(\ell)) \geq \left(1 - \frac{\epsilon}{k} \cdot c\right) \cdot \gamma$$

for all  $i \in [k]$ .

Due to the initial truncation, we have that  $f_i^\gamma(S) \leq \gamma$  with probability one. Thus, using Markov's inequality for each  $i \in [k]$ , we obtain that with probability at least  $1 - \frac{\epsilon}{k}$ , we have  $f_i^\gamma(S) \geq (1 - \epsilon)\gamma$ . Therefore, taking a union bound over  $k$  functions, we obtain  $f_i^\gamma(S) \geq (1 - \epsilon)\gamma$  for all  $i \in [k]$  with probability at least  $1 - c$ , and since  $f_i(S) \geq f_i^\gamma(S)$  we get an integral solution  $S$  with max-min value at least  $(1 - \epsilon)\gamma$  as claimed.  $\square$

### B.3 Necessity of monotonicity

In light of the approximation algorithms for non-monotone submodular function maximization under matroid constraints (see, for example, (Lee et al., 2009)), one might hope that an analogous bi-criteria approximation algorithm could exist for robust non-monotone submodular function maximization. However, we show that even without any matroid constraints, getting any approximation in the non-monotone case is NP-hard.

**Lemma 3.** *Unless  $P = NP$ , no polynomial time algorithm can output a set  $\tilde{S} \subseteq V$  given general submodular functions  $f_1, \dots, f_k$  such that  $\min_{i \in [k]} f_i(\tilde{S})$  is within a positive factor of  $\max_{S \subseteq V} \min_{i \in [k]} f_i(S)$ .*

*Proof.* We use a reduction from SAT. Suppose that we have a SAT instance with variables  $x_1, \dots, x_n$ . Consider  $V = \{1, \dots, n\}$ . For every clause in the SAT instance we introduce a nonnegative linear (and therefore submodular) function. For a clause  $\bigvee_{i \in A} x_i \vee \bigvee_{i \in B} \bar{x}_i$  define

$$f(S) := |S \cap A| + |B \setminus S|.$$

It is easy to see that  $f$  is linear and nonnegative. If we let  $S$  be the set of true variables in a truth assignment, then it is easy to see that  $f(S) > 0$  if and only if the corresponding clause is satisfied. Consequently, finding a set  $S$  such that all functions  $f$  corresponding to different clauses are positive is as hard as finding a satisfying assignment for the SAT instance.  $\square$

## C Preliminaries for the Online Algorithm

### C.1 Properties of the Soft-Min function

Consider a set of  $k$  twice differentiable, real-valued functions  $g_1, \dots, g_k$ . Let  $g_{\min}$  be the minimum among these functions, i.e., for each point  $x$  in the domain, define  $g_{\min}(x) := \min_{i \in [k]} g_i(x)$ . This function can be approximated by using the so-called *soft-min* function  $H$  defined as

$$H(x) = -\frac{1}{\alpha} \ln \sum_{i \in [k]} e^{-\alpha g_i(x)},$$

where  $\alpha > 0$  is a fixed parameter. We now present some of the key properties of this function in the following lemma.

**Lemma 4.** *For any set of  $k$  twice differentiable, real-valued functions  $g_1, \dots, g_k$ , the soft-min function  $H$  satisfies the following properties:*

1. *Bounds:*

$$g_{\min}(x) - \frac{\ln k}{\alpha} \leq H(x) \leq g_{\min}(x). \quad (15)$$

2. *Gradient:*

$$\nabla H(x) = \sum_{i \in [k]} p_i(x) \nabla g_i(x), \quad (16)$$

where  $p_i(x) := e^{-\alpha g_i(x)} / \sum_{j \in [k]} e^{-\alpha g_j(x)}$ . Clearly, if  $\nabla g_i \geq 0$  for all  $i \in [k]$ , then  $\nabla H \geq 0$ .

3. *Hessian:*

$$\begin{aligned} \frac{\partial^2 H(x)}{\partial x_{e_1} \partial x_{e_2}} &= \sum_{i \in [k]} p_i(x) \left( -\alpha \frac{\partial g_i(x)}{\partial x_{e_1}} \frac{\partial g_i(x)}{\partial x_{e_2}} \right. \\ &\quad \left. + \frac{\partial^2 g_i(x)}{\partial x_{e_1} \partial x_{e_2}} \right) + \alpha \nabla_{e_1} H(x) \cdot \nabla_{e_2} H(x) \end{aligned} \quad (17)$$

Moreover, if for all  $i \in [k]$  we have  $\left| \frac{\partial g_i}{\partial x_{e_1}} \right| \leq L_1$ , and  $\left| \frac{\partial^2 g_i}{\partial x_{e_1} \partial x_{e_2}} \right| \leq L_2$ , then  $\left| \frac{\partial^2 H}{\partial x_{e_1} \partial x_{e_2}} \right| \leq 2\alpha L_1^2 + L_2$ .

4. *Comparing the average of the  $g_i$  functions with  $H$ : given  $T > 0$  we have*

$$\begin{aligned} H(x) &\leq \sum_{i \in [k]} p_i(x) g_i(x) \\ &\leq H(x) + \frac{n + \ln T}{\alpha} + \frac{\ln k}{\alpha} + \frac{k e^{-n}}{T}. \end{aligned} \quad (18)$$

So, for  $\alpha > 0$  sufficiently large  $\sum_{i \in [k]} p_i(x) g_i(x)$  is a good approximation of  $H(x)$ .

*Proof.* We will just prove properties 1 and 4, since the rest is an straightforward calculation.

1. First, for all  $i \in [k]$  we have  $e^{-\alpha g_i(x)} \leq e^{-\alpha g_{\min}(x)}$ . Thus,

$$\begin{aligned} H(x) &= -\frac{1}{\alpha} \ln \sum_{i \in [k]} e^{-\alpha g_i(x)} \geq -\frac{1}{\alpha} \ln \left( k e^{-\alpha g_{\min}(x)} \right) \\ &= g_{\min}(x) - \frac{\ln k}{\alpha} \end{aligned}$$

On the other hand,  $\sum_{i \in [k]} e^{-\alpha g_i(x)} \geq e^{-\alpha g_{\min}(x)}$ . Hence,

$$H(x) \leq -\frac{1}{\alpha} \ln \left( e^{-\alpha g_{\min}(x)} \right) = g_{\min}(x).$$

4. Let us consider sets  $A_1 = \{i \in [k] : g_i(x) \leq g_{\min}(x) + (n + \ln T)/\alpha\}$  and  $A_2 = \{i \in [k] : g_i(x) > g_{\min}(x) + (n + \ln T)/\alpha\}$ . Our intuitive argument is the following: when  $\alpha$  is sufficiently large, those  $p_i(x)$ 's with  $i \in A_2$  are exponentially small, and  $p_i(x)$ 's with  $i \in A_1$  go to a uniform distribution over elements in  $A_1$ . First, observe that for each  $i \in A_2$  we have

$$\begin{aligned} p_i(x) &= \frac{e^{-\alpha g_i(x)}}{\sum_{i \in [k]} e^{-\alpha g_i(x)}} < \frac{e^{-\alpha[g_{\min}(x) + (n + \ln T)/\alpha]}}{e^{-\alpha g_{\min}(x)}} \\ &= \frac{e^{-n}}{T}, \end{aligned}$$

so  $\sum_{i \in A_2} p_i(x) g_i(x) \leq \frac{k e^{-n}}{T}$ . On the other hand, for any  $i \in A_1$  we have

$$\begin{aligned} \sum_{i \in A_1} p_i(x) g_i(x) &\leq \left( g_{\min}(x) + \frac{n + \ln T}{\alpha} \right) \sum_{i \in A_1} p_i(x) \\ &\leq H(x) + \frac{n + \ln T}{\alpha} + \frac{\ln k}{\alpha} \end{aligned}$$

where in the last inequality we used the approximation property of the soft-min function. Therefore,

$$\sum_{i \in [k]} p_i(x) g_i(x) \leq H(x) + \frac{n + \ln T}{\alpha} + \frac{\ln k}{\alpha} + \frac{k e^{-n}}{T}.$$

Finally, the other inequality is clear since  $\sum_{i \in [k]} p_i(x) g_i(x) \geq g_{\min}(x) \geq H(x)$ .

□

Now, we prove a lemma which is used to prove Theorem 2. This is done via a simple Taylor approximation.

**Lemma 5.** Fix a parameter  $\delta > 0$ . Consider  $T$  collections of  $k$  twice-differentiable functions, namely  $\{g_i^1\}_{i \in [k]}, \dots, \{g_i^T\}_{i \in [k]}$ . Assume  $0 \leq g_i^t(x) \leq 1$  for

any  $x$  in the domain, for all  $t \in [T]$  and  $i \in [k]$ . Define the corresponding sequence of soft-min functions  $H^1, \dots, H^T$ , with a common parameter  $\alpha > 0$ . Then, any two sequences of points  $\{x^t\}_{t \in [T]}, \{y^t\}_{t \in [T]} \subseteq [0, 1]^V$  with  $|x^t - y^t| \leq \delta$  satisfy

$$\begin{aligned} \sum_{t \in [T]} H^t(y^t) - \sum_{t \in [T]} H^t(x^t) \\ \geq \sum_{e \in V} \sum_{t \in [T]} \nabla_e H^t(x^t) (y_e^t - x_e^t) - O(T n^2 \delta^2 \alpha). \end{aligned}$$

*Proof.* For every  $t \in [T]$  define a matroid  $\mathcal{M}_t = (V \times \{t\}, \mathcal{I} \times \{t\}) = (V_t, \mathcal{I}_t)$ . Given this, the union matroid is given by a ground set  $V^{[T]} = \bigcup_{t=1}^T V_t$ , and independent set family  $\mathcal{I}^{[T]} = \{S \subseteq V^{[T]} : S \cap V_t \in \mathcal{I}_t\}$ . Define  $\mathbb{H}(X) := \sum_{t \in [T]} H^t(x^t)$  for any matrix  $X \in \mathcal{P}(\mathcal{M})^T$ , where  $x^t$  denotes the  $t$ -th column of  $X$ . Clearly,  $\nabla_{(e,t)} \mathbb{H}(X) = \nabla_e H^t(x^t)$ . Moreover, the Hessian corresponds to

$$\nabla_{(e_1,t),(e_2,s)}^2 \mathbb{H}(X) = \begin{cases} 0 & \text{if } t \neq s \\ \nabla_{e_1,e_2}^2 H^t(x^t) & \text{if } t = s \end{cases}$$

Consider any  $X, Y \in \mathcal{P}(\mathcal{M})^T$  with  $|y_e^t - x_e^t| \leq \delta$ . Therefore, a Taylor's expansion of  $\mathbb{H}$  gives

$$\begin{aligned} \mathbb{H}(Y) &= \mathbb{H}(X) + \nabla \mathbb{H}(X) \cdot (Y - X) \\ &\quad + \frac{1}{2} (Y - X)^\top \nabla^2 \mathbb{H}(\xi) \cdot (Y - X) \end{aligned}$$

where  $\xi$  is on the line between  $X$  and  $Y$ . If we expand the previous expression we obtain

$$\begin{aligned} \mathbb{H}(Y) - \mathbb{H}(X) &= \sum_{e \in V} \sum_{t \in [T]} \nabla_e H^t(x^t) (y_e^t - x_e^t) \\ &\quad + \frac{1}{2} \sum_{e_1, e_2 \in V} \sum_{t \in [T]} (y_{e_1}^t - x_{e_1}^t) \nabla_{e_1, e_2}^2 H^t(\xi) (y_{e_2}^t - x_{e_2}^t) \end{aligned}$$

Finally, by using property 3 in Lemma 4 and by bounding the Hessian (and using the fact that  $g_i^t(x) \in [0, 1]$ ) we get

$$\mathbb{H}(Y) - \mathbb{H}(X) \geq \sum_{e \in V} \sum_{t=1}^T \nabla_e H^t(x^t) (y_e^t - x_e^t) - O(T n^2 \delta^2 \alpha),$$

which is equivalent to

$$\begin{aligned} \sum_{t \in [T]} H^t(y^t) - \sum_{t \in [T]} H^t(x^t) \\ \geq \sum_{e \in V} \sum_{t \in [T]} \nabla_e H^t(x^t) (y_e^t - x_e^t) - O(T n^2 \delta^2 \alpha). \end{aligned}$$

□

## C.2 Proof of Theorem 2

In order to get sub-linear regret for the FPL algorithm 4, Kalai and Vempala (2005) assume a couple of conditions on the problem (see Appendix C.3). Similarly, for our online model we need to consider the following for any  $t \in [T]$ :

1. bounded diameter of  $\mathcal{P}(\mathcal{M})$ , i.e., for all  $y, y' \in \mathcal{P}(\mathcal{M})$ ,  $\|y - y'\|_1 \leq D$ ;
2. for all  $x, y \in \mathcal{P}(\mathcal{M})$ , we require  $|y \cdot \Delta H^t(x)| \leq L$ ;
3. for all  $y \in \mathcal{P}(\mathcal{M})$ , we require  $\|\Delta H^t(y)\|_1 \leq A$ ,

Now, we give a complete proof of Theorem 2 for any given learning parameter  $\eta > 0$ , but the final result follows with  $\eta = \sqrt{D/LAT}$  and assuming  $L \leq n$ ,  $A \leq n$  and  $D \leq \sqrt{n}$ , which gives a  $O(n^{5/4})$  dependency on the dimension in the regret.

*Proof.* Consider the sequence of multilinear extensions  $\{F_i^1\}_{i \in [k]}, \dots, \{F_i^T\}_{i \in [k]}$  derived from the monotone submodular functions  $f_i^t$  obtained during the dynamic process. Since  $f_i^t$ 's have value in  $[0, 1]$ , we have  $0 \leq F_i^t(y) \leq 1$  for any  $y \in [0, 1]^V$  and  $i \in [k]$ . Consider the corresponding soft-min functions  $H^t$  for collection  $\{F_i^t\}_{i \in [k]}$  with  $\alpha = n^2 T^2$  for all  $t \in [T]$ . Denote  $\ell = \lceil \ln \frac{1}{\epsilon} \rceil$  and fix  $\tau \in \{\delta, 2\delta, \dots, \ell\}$  with  $\delta = n^{-6} T^{-3}$ . According to the update in Algorithm 2,  $\{y_\tau^t\}_{t \in [T]}$  and  $\{y_{\tau-\delta}^t\}_{t \in [T]}$  satisfy conditions of Lemma 5. Thus, we obtain

$$\begin{aligned} & \sum_{t \in [T]} H^t(y_\tau^t) - H^t(y_{\tau-\delta}^t) \\ & \geq \sum_{t \in [T]} \nabla H^t(y_{\tau-\delta}^t) \cdot (y_\tau^t - y_{\tau-\delta}^t) - O(Tn^3 \delta^2 \alpha). \end{aligned}$$

Then, since the update is  $y_{\tau,e}^t = y_{\tau-\delta,e}^t + \delta(1 - y_{\tau-\delta,e}^t) z_{\tau,e}^t$ , we get

$$\begin{aligned} & \sum_{t \in [T]} H^t(y_\tau^t) - H^t(y_{\tau-\delta}^t) \\ & \geq \delta \sum_{t \in [T]} \sum_{e \in V} \nabla_e H^t(y_{\tau-\delta}^t) (1 - y_{\tau-\delta,e}^t) z_{\tau,e}^t - O(Tn^3 \delta^2 \alpha) \\ & = \delta \sum_{t \in [T]} \Delta H^t(y_{\tau-\delta}^t) \cdot z_\tau^t - O(Tn^3 \delta^2 \alpha). \end{aligned} \quad (19)$$

Observe that an FPL algorithm is implemented for each  $\tau$ , so we can state a regret bound for each  $\tau$  by

using Theorem 4. Specifically,

$$\begin{aligned} & \mathbb{E} \left[ \sum_{t \in [T]} \Delta H^t(y_{\tau-\delta}^t) \cdot z_\tau^t \right] \geq \\ & \max_{z \in \mathcal{P}(\mathcal{M})} \mathbb{E} \left[ \sum_{t \in [T]} \Delta H^t(y_{\tau-\delta}^t) \cdot z \right] - R_\eta, \end{aligned}$$

where  $R_\eta = \eta LAT + \frac{D}{\eta}$  is the regret guarantee for a given  $\eta > 0$ . By taking expectation in (19) and using the regret bound we just mentioned, we obtain

$$\begin{aligned} & \mathbb{E} \left[ \sum_{t \in [T]} H^t(y_\tau^t) - H^t(y_{\tau-\delta}^t) \right] \quad (20) \\ & \geq \delta \left( \max_{z \in \mathcal{P}(\mathcal{M})} \mathbb{E} \left[ \sum_{t \in [T]} \Delta H^t(y_{\tau-\delta}^t) \cdot z \right] \right) - \delta R_\eta \quad (21) \\ & \quad - O(Tn^3 \delta^2 \alpha) \\ & \geq \delta \mathbb{E} \left( \sum_{t \in [T]} \left[ H^t(x^*) - \sum_{i \in [k]} p_i^t(y_{\tau-\delta}^t) F_i^t(y_{\tau-\delta}^t) \right] \right) \\ & \quad - \delta R_\eta - O(Tn^3 \delta^2 \alpha), \quad (22) \end{aligned}$$

where  $x^*$  is the true optimum for  $\max_{x \in \mathcal{P}(\mathcal{M})} \sum_{t \in [T]} \min_{i \in [k]} F_i^t(x)$ . Observe that (20) follows from monotonicity and submodularity of each  $f_i^t$ , specifically we know that

$$\begin{aligned} \Delta H^t(y) \cdot z & = \sum_{i \in [k]} p_i^t(y) \Delta F_i^t(y) \cdot z \\ & \geq \sum_{i \in [k]} p_i^t(y) F_i^t(x^*) - \sum_{i \in [k]} p_i^t(y) F_i^t(y) \quad (\text{eq. (13)}) \\ & \geq F_{\min}^t(x^*) - \sum_{i \in [k]} p_i^t(y) F_i^t(y) \\ & \geq H^t(x^*) - \sum_{i \in [k]} p_i^t(y) F_i^t(y). \end{aligned}$$

By applying property (18) of the soft-min in expression (20) we get

$$\begin{aligned} & \mathbb{E} \left[ \sum_{t \in [T]} H^t(y_\tau^t) - H^t(y_{\tau-\delta}^t) \right] \geq \\ & \delta \mathbb{E} \left( \sum_{t \in [T]} H^t(x^*) - H^t(y_{\tau-\delta}^t) \right) - \delta R_\eta - O(Tn^3 \delta^2 \alpha) \\ & \quad - \delta T \left( \frac{n + \ln T}{\alpha} - \frac{\ln k}{\alpha} - \frac{ke^{-n}}{T} \right), \end{aligned} \quad (23)$$

Given the choice of  $\alpha$  and  $\delta$ , the last two terms in the right-hand side of inequality (23) are small compared to

$R_\eta$ , so by re-arranging terms we can state the following

$$\begin{aligned} & \sum_{t \in [T]} H^t(x^*) - \mathbb{E} \left[ \sum_{t \in [T]} H^t(y_\tau^t) \right] \\ & \leq (1 - \delta) \left( \sum_{t \in [T]} H^t(x^*) - \mathbb{E} \left[ \sum_{t \in [T]} H^t(y_{\tau-\delta}^t) \right] \right) \\ & \quad + 2\delta R_\eta \end{aligned}$$

By iterating  $\frac{\ell}{\delta}$  times in  $\tau$ , we get

$$\begin{aligned} & \sum_{t \in [T]} H^t(x^*) - \mathbb{E} \left[ \sum_{t \in [T]} H^t(y_\ell^t) \right] \\ & \leq (1 - \delta)^{\frac{\ell}{\delta}} \left( \sum_{t \in [T]} H^t(x^*) - \sum_{t \in [T]} H^t(y_0^t) \right) \\ & \quad + O \left( R_\eta \ln \frac{1}{\epsilon} \right) \\ & \leq \epsilon \left[ \sum_{t \in [T]} H^t(x^*) + \frac{\ln k}{n^2 T} \right] + O \left( R_\eta \ln \frac{1}{\epsilon} \right), \end{aligned}$$

where in the last inequality we used  $(1 - \delta) \leq e^{-\delta}$ . Given that the term  $\frac{\ln(k)}{n^2 T}$  is small (for  $T$  and  $n$  sufficiently large) we can bound it by  $O(R_\eta \ln \frac{1}{\epsilon})$ . Since  $\alpha$  is sufficiently large, we can apply the approximation property of soft-min function to obtain the following regret bound

$$\begin{aligned} & (1 - \epsilon) \cdot \sum_{t \in [T]} \min_{i \in [k]} F_i^t(x^*) - \mathbb{E} \left[ \sum_{t \in [T]} \min_{i \in [k]} F_i^t(y_\ell^t) \right] \\ & \leq O \left( R_\eta \ln \frac{1}{\epsilon} \right). \end{aligned}$$

Since we are doing randomized swap rounding on each  $y_\ell^t$ , Theorem 5 shows that there is a random set  $S^t$  that is independent in  $\mathcal{M}_\ell$  (i.e.,  $S^t$  is the union of at most  $\ell$  independent sets in  $\mathcal{I}$ ) such that  $\mathbb{E}[f_i^t(S^t)] \geq F_i^t(y_\ell^t)$  for all  $t \in [T]$  and  $i \in [k]$ . Thus, we finally obtain

$$\begin{aligned} & (1 - \epsilon) \cdot \max_{S \in \mathcal{I}} \sum_{t \in [T]} \min_{i \in [k]} f_i^t(S) - \sum_{t \in [T]} \min_{i \in [k]} \mathbb{E}[f_i^t(S^t)] \\ & \leq O \left( R_\eta \ln \frac{1}{\epsilon} \right). \end{aligned}$$

□

**Observation 1.** *Theorem 2 could be easily extended to an adaptive adversary by sampling in each stage  $t \in [T]$  a different perturbation  $q_t \sim [0, 1/\eta]^V$  as shown in (Kalai and Vempala, 2005).*

### C.3 Follow-the-Perturbed-Leader algorithm

In this section, we briefly recall the well-known Follow-the-Perturbed-Leader (FPL) algorithm introduced in (Kalai and Vempala, 2005) and used in many online optimization problems (see e.g., (Rakhlin, 2009)). The classical online learning framework is as follows: Consider a dynamic process over  $T$  time steps. In each stage  $t \in [T]$ , a decision-maker has to choose a point  $d_t \in \mathcal{D}$  from a fixed (possibly infinite) set of actions  $\mathcal{D} \subseteq \mathbb{R}^n$ , then an adversary chooses a vector  $s_t$  from a set  $\mathcal{S}$ . Finally, the player observes vector  $s_t$  and receives reward  $s_t \cdot d_t$ , and the process continues. The goal of the player is to maximize the total reward  $\sum_{t \in [T]} s_t \cdot d_t$ , and we compare her performance with respect to the best single action picked in hindsight, i.e.,  $\max_{d \in \mathcal{D}} \sum_{t=1}^T s_t \cdot d$ . This performance with respect to the best single action in hindsight is called (expected) *regret*, formally:

$$\text{Regret}(T) = \max_{d \in \mathcal{D}} \sum_{t \in [T]} s_t \cdot d - \mathbb{E} \left[ \sum_{t \in [T]} s_t \cdot d_t \right].$$

Kalai and Vempala (2005) showed that even if one has only access to a linear programming oracle for  $\mathcal{D}$ , i.e., we can efficiently solve  $\max_{d \in \mathcal{D}} s \cdot d$  for any  $s \in \mathcal{S}$ , then the FPL algorithm 4 achieves sub-linear regret, specifically  $O(\sqrt{T})$ .

In order to state the main result in (Kalai and Vempala, 2005), we need the following. We assume that the decision set  $\mathcal{D}$  has diameter at most  $D$ , i.e., for all  $d, d' \in \mathcal{D}$ ,  $\|d - d'\|_1 \leq D$ . Further, for all  $d \in \mathcal{D}$  and  $s \in \mathcal{S}$  we assume that the absolute reward is bounded by  $L$ , i.e.,  $|d \cdot s| \leq L$  and that the  $\ell_1$ -norm of the reward vectors is bounded by  $A$ , i.e., for all  $s \in \mathcal{S}$ ,  $\|s\|_1 \leq A$ .

**Theorem 7** ((Kalai and Vempala, 2005)). *Let  $s_1, \dots, s_T \in \mathcal{S}$  be a sequence of rewards. Running the FPL algorithm 4 with parameter  $\eta \leq 1$  ensures regret*

$$\text{Regret}(T) \leq \eta LAT + \frac{D}{\eta}.$$

Moreover, if we choose  $\eta = \sqrt{D/LAT}$ , then  $\text{Regret}(T) \leq 2\sqrt{DLAT} = O(\sqrt{T})$ .

---

**Algorithm 4** Follow-the-Perturbed-Leader (FPL), (Kalai and Vempala, 2005)

---

**Input:** Parameter  $\eta > 0$

**Output:** Sequence of decisions  $d_1, \dots, d_T$

1: Sample  $q \sim [0, 1/\eta]^n$ .

2: **for**  $t = 1$  to  $T$  **do**

3:     **Play**  $d_t = \operatorname{argmax}_{d \in \mathcal{D}} \left( \sum_{j=1}^{t-1} s_j + q \right)^\top d$ .

---
